# 1 Associations between accurate measures of adiposity and fitness, blood 2 proteins, and insulin sensitivity among South Asians and Europeans

3  
4 Pik Fang Kho<sup>1,2†</sup>, Laurel Stell<sup>3†</sup>, Shirin Jimenez<sup>1,4</sup>, Daniela Zanetti<sup>1,2,5</sup>, Daniel J Panyard<sup>6</sup>, Kathleen L  
5 Watson<sup>7</sup>, Ashish Sarraju<sup>1,8</sup>, Ming-Li Chen<sup>1,2</sup>, Lars Lind<sup>9</sup>, John R Petrie<sup>10</sup>, Khin N Chan<sup>2</sup>, Holly Fonda<sup>2</sup>,  
6 Kyla Kent<sup>2,11</sup>, Jonathan N Myers<sup>1,2,12</sup>, Latha Palaniappan<sup>1,12,13</sup>, Fahim Abbasi<sup>1#</sup>, Themistocles L.  
7 Assimes<sup>1,2,12,13#</sup>

8  
9 <sup>1</sup>Department of Medicine, Division of Cardiovascular Medicine, Stanford University School of Medicine,  
10 Stanford, CA, USA, <sup>2</sup>VA Palo Alto Healthcare System, Palo Alto, CA, USA, <sup>3</sup>Department of Biomedical  
11 Data Science, Stanford University, Stanford, CA, USA, <sup>4</sup>Department of Internal Medicine, Division of  
12 Cardiovascular Medicine, University of California Davis Health, Davis, CA, USA, <sup>5</sup>Institute of Genetic and  
13 Biomedical Research, National Research Council, Cagliari, Sardinia, Italy, <sup>6</sup>Department of Genetics,  
14 Stanford University School of Medicine, Stanford, CA, USA, <sup>7</sup>Department of Psychiatry, Stanford  
15 University School of Medicine, Stanford, CA, USA, <sup>8</sup>Department of Cardiovascular Medicine, Cleveland  
16 Clinic, Cleveland, CA, USA, <sup>9</sup>Department of Medical Sciences, Uppsala University, Uppsala, Sweden.  
17 <sup>10</sup>School of Health and Wellbeing, College of Medical, Veterinary and Life Sciences, University of  
18 Glasgow, Glasgow, UK. <sup>11</sup>Department of Medicine, Stanford Prevention Research Center, Stanford  
19 University School of Medicine, Stanford, CA, USA, <sup>12</sup>Cardiovascular Institute, Stanford University School  
20 of Medicine, Stanford, CA, USA, <sup>13</sup>Department of Epidemiology and Population Health, Stanford  
21 University School of Medicine, Stanford, CA, USA

22  
23  
24 † These authors contributed equally to this work and share first authorship  
25 #These authors jointly supervised this work and share last authorship

## 26 **Corresponding Author:**

27 Themistocles L. Assimes, MD, PhD

28 E-mail: [tassimes@stanford.edu](mailto:tassimes@stanford.edu)

29 Word count: 6429

30 Number of tables: 2 main, 2 supplementary

31 Number of figures: 2 main, 2 supplementary

## 33 Abstract

34 **Objective:** South Asians (SAs) may possess a unique predisposition to insulin resistance (IR). We explored  
35 this possibility by investigating the relationship between ‘gold standard’ measures of adiposity, fitness,  
36 selected proteomic biomarkers, and insulin sensitivity among a cohort of SAs and Europeans (EURs).

37 **Methods:** A total of 46 SAs and 41 EURs completed ‘conventional’ (lifestyle questionnaires, standard  
38 physical exam) as well as ‘gold standard’ (dual energy X-ray absorptiometry scan, cardiopulmonary  
39 exercise test, and insulin suppression test) assessments of adiposity, fitness, and insulin sensitivity. In a  
40 subset of 28 SAs and 36 EURs, we also measured the blood-levels of eleven IR-related proteins. We  
41 conducted Spearman correlation to identify correlates of steady-state plasma glucose (SSPG) derived from  
42 the insulin suppression test, followed by multivariable linear regression analyses of SSPG, adjusting for  
43 age, sex and ancestral group.

44 **Results:** Sixteen of 30 measures significantly associated with SSPG, including one conventional and eight  
45 gold standard measures of adiposity, one conventional and one gold standard measure of fitness, and five  
46 proteins. Multivariable regressions revealed that gold standard measures and plasma proteins attenuated  
47 ancestral group differences in IR, suggesting their potential utility in assessing IR, especially among SAs.

48 **Conclusion:** Ancestral group differences in IR may be explained by accurate measures of adiposity and  
49 fitness, with specific proteins possibly serving as useful surrogates for these measures, particularly for SAs.  
50

## 51 Introduction

52 Insulin resistance (IR) is characterized by decreased sensitivity to insulin-stimulate glucose uptake in  
53 skeletal muscle resulting in a compensatory hyperinsulinemia and several metabolic abnormalities and  
54 clinical syndromes, including Type 2 diabetes (T2D) and atherosclerotic cardiovascular disease (ASCVD)  
55 (1). On average, individuals of South Asian (SAs) ancestry – generally people whose ancestors originate in  
56 India, Sri Lanka, Bangladesh, Nepal, and Pakistan – are more IR, and develop T2D and ASCVD at  
57 substantially younger age and lower body mass index (BMI) compared to European ancestry individuals  
58 (EURs) (2-4). While some argue that SAs possess a population-specific genetic susceptibility to IR  
59 independent of traditional risk factors, the scientific evidence to support this hypothesis is debatable (2-4).

60 Accurately measuring IR and its primary modifiable determinants – adiposity and cardiorespiratory  
61 fitness - in humans is time consuming and expensive (5-7). The Insulin Suppression test (IST) is one of two  
62 gold standard methods for direct measurement of insulin-stimulated glucose uptake that yields a measure of  
63 IR with unequivocal physiological interpretation but requires intensive monitoring over ~3-4 hours to  
64 complete (5). Adiposity is commonly estimated by documenting body mass index (BMI) and waist  
65 circumference (WC) but these measures do not accurately reflect the volume and distribution of body fat in  
66 relation to other types of tissues (8). Physical fitness is usually assessed through self-report questionnaires  
67 of physical activity which are susceptible to recall and information bias (9). Gold standard measures such  
68 as dual energy x-ray absorptiometry (DXA) and maximal  $VO_2$  ( $VO_2$  max) may provide a more accurate  
69 assessment of adiposity and physical fitness, respectively, and may better explain differences in IR between  
70 populations at variable risk (8, 10-12). Moreover, recent advancements in the field of plasma proteomics  
71 have enabled the identification of proteomics biomarkers that can predict gold standard measure of IR more  
72 accurately than the clinical variables (13). The role of such proteins in explaining differences in insulin  
73 sensitivity between populations is unclear.

74 We hypothesized that differences in IR between SAs and EURs may be at least partially attributed  
75 to the usage of suboptimal assessments of adiposity, fitness, and IR. To test this hypothesis, we measured  
76 these health traits using both ‘conventional’ and, more accurate, ‘gold standard’ approaches in a modest  
77 number of healthy SAs and EURs and assessed whether the gold standard measures might better explain  
78 ancestral differences in insulin sensitivity between SAs and EURs. In addition, we assessed whether the  
79 levels of eleven proteins in plasma previously robustly associated with IR might explain differences in  
80 insulin sensitivity between the two groups (13).

## 81 Materials and Methods

### 82 Study Population and Design

83 We recruited generally healthy individuals between 19 and 75 years of age who were living in the San  
84 Francisco Bay Area and reported that all four of their biological grandparents originated either from South  
85 Asian countries (Afghanistan, Bangladesh, Bhutan, India, Maldives, Pakistan, Nepal and Sri Lanka) or  
86 European countries. Volunteers responded to local (on campus) and regional (off campus) in-print and  
87 email advertisements about the study, and eligible participants were enrolled between 2012 and 2015. We  
88 excluded individuals with any type of diabetes, complications of ASCVD, active cancer, any terminal  
89 disease, renal dysfunction, liver dysfunction, anemia, systolic blood pressure >160 mm Hg, heart block, or  
90 bradyarrhythmias. We also excluded pregnant or lactating women and individuals receiving treatment with  
91 glucose-lowering medications.

92 Participants underwent a 2-day testing protocol. On Day 1 of the protocol, volunteers completed  
93 informed consent and then underwent a DXA scan to document regional body fat followed by an exercise  
94 treadmill test to document  $VO_2$  max. They also completed a questionnaire on their lifetime physical activity  
95 after the age of 25 years. On Day 2 of the protocol, participants underwent an insulin suppression test  
96 (IST) and filled out additional questionnaires documenting their medical history, current prescribed and  
97 over-the-counter medications, and their aerobic physical activity in the seven days before the IST.

98 Additionally, a standardized protocol was used to process and bank fasting blood for future biomarker  
99 analysis. The protocol was reviewed and approved by the Institutional Review Board at the Stanford  
100 University School of Medicine and all participants provided informed consent.

#### 101 [Clinical Measures related to Adiposity](#)

102 Adiposity was measured using conventional and gold standard measures. Conventional measures included  
103 weight, height, and waist circumference (WC). On the day of the IST, weight was measured while  
104 participants were wearing light clothing and no shoes. Height was measured by a stadiometer. Body mass  
105 index (BMI) was calculated by dividing weight in kilograms by the square of height in meters. WC was  
106 measured at the midpoint between the lower rib cage and the upper iliac crest in mid respiration while  
107 participants were standing. The gold standard measures of adiposity were derived through DXA. We used a  
108 Lunar iDXA scanner (GE Healthcare) to perform regional body composition analysis of all volunteers that  
109 included quantification of fat mass, fat-free mass, and bone mineral content. With this scanner, android and  
110 gynoid regions-of-interest (ROIs) are automatically placed and ratios are automatically calculated. The  
111 android ROI includes the area between the pelvis cut line extending upwards to include 20% of the distance  
112 between the pelvis and neck cut lines. The arm cut lines when in the normal position for a total body scan  
113 define lateral boundaries. The gynoid ROI is positioned with the upper boundary positioned below the  
114 pelvis cut line a distance equal to 1.5 times the height of the android region. The lower boundary is located  
115 a distance 3.5 times the height of the android region from the pelvis cut line. Lateral boundaries are the  
116 outer leg cut lines.

#### 117 [Clinical Measures related to Physical Activity and Fitness](#)

118 Physical activity was measured using conventional and gold standard measures. Conventional measures  
119 included self-report questionnaires. We assessed lifetime physical activity using the Lifetime Physical  
120 Activity Questionnaire (14) and physical activity within the last week using the short form of the  
121 International Physical Activity Questionnaire (IPAQ) (15). The IPAQ data were scored using the  
122 continuous score protocol in which Metabolic Equivalent of Task (MET)-minutes for each study  
123 participant's activity were calculated as per standardized guidelines. The gold standard measure of fitness  
124 consisted of a cardiopulmonary exercise treadmill test (CPET) where we implemented a standardized  
125 symptom-limited, individualized ramp treadmill testing protocol combined with a metabolic cart to  
126 determine maximal oxygen consumption (i.e.,  $VO_2$  max) (16). Briefly, participants filled out a short one-  
127 page questionnaire about physical activities on the day of the CPET designed to predict a participants peak  
128 MET level. This estimate was then used to tailor the "ramp" protocol in which small increments of work  
129 rate occurred at intervals of <10 to 60 seconds to yield a fatigue-limited exercise duration of ~8 to 12  
130 minutes. Effort was assessed using the Borg Rating of Perceived Exertion and the test was considered  
131 successful when a scale of 17 or more was reported and the participant indicated that the test be stopped  
132 due to peak exercise leg weakness or intolerable dyspnea on exertion. Importantly, all except one  
133 participant for this study had fasting plasma glucose levels within the normal range (< 125 mg/dL), with no  
134 history of diabetes, either treated or untreated. These criteria ensured that the  $VO_2$  max measurements  
135 reflected true cardiorespiratory fitness, free from potential confounding effects of hyperglycemia.

#### 136 [Insulin Suppression Test](#)

137 We performed an IST to directly measure insulin-stimulated glucose disposal (17). Briefly, intravenous  
138 (IV) access was obtained in each arm of the participants after an overnight fast. One IV was used for  
139 administering a continuous infusion of octreotide acetate ( $0.27 \mu\text{U}/\text{m}^2/\text{min}$ ), insulin ( $32 \text{mU}/\text{m}^2/\text{min}$ ), and  
140 glucose ( $267 \text{mg}/\text{m}^2/\text{min}$ ) at a constant rate for up to three hours, while the other IV was used for collecting  
141 blood samples. Blood samples were drawn every 30 minutes (min) until 150 min for plasma glucose and  
142 then every 10 min until 180 min for plasma insulin and glucose. We averaged the four insulin and glucose  
143 values obtained from 150 to 180 min to calculate the steady-state plasma insulin (SSPI) and steady-state  
144 plasma glucose (SSPG) concentrations. SSPI concentrations were comparable among participants with  
145 identical glucose infusion rates making the magnitude of the SSPG an accurate estimate of one's insulin-  
146 mediated glucose disposal, with a higher SSPG indicating a more insulin-resistant individual.

## 147 Plasma proteomic measures

148 We employed the proximity extension assay developed by OLINK, utilizing the first version of EXPLORE  
149 platform to quantify up to 1,471 proteins across four 384-plex panels (Cardiometabolic, Inflammation,  
150 Neurology and Oncology) in plasma samples from a subset of SA and EUR individuals. This analysis is  
151 part of a broader study encompassing 1,012 participants from various research protocols at Stanford,  
152 including assessments of insulin sensitivity using the IST (to be reported separately). Samples from 18 SAs  
153 and 5 EURs were inadvertently lost during a reorganization of freezers, leaving 28 SAs and 36 EURs in  
154 this analysis. Our analysis focused on 11 plasma proteins which were previously shown to predict gold  
155 standard measures of insulin sensitivity in two European cohorts (RISC and ULSAM). These proteins  
156 included: Fatty acid binding protein 2 (FABP2), Fatty acid binding protein 4 (FABP4), Insulin-like growth  
157 factor binding protein 1 (IGFBP1), Insulin-like growth factor binding protein 2 (IGFBP2), Inhibin beta C  
158 chain (INHBC), Leptin (LEP), Reticulon 4 receptor (RTN4R), Secretoglobin family 3A member 2  
159 (SCGB3A2), Adhesion G protein-coupled receptor G1 (ADRG1), Integrin subunit alpha V (ITGAV), and  
160 Lipoprotein lipase (LPL). The Uniprot ID for each protein can be found in **Supplementary Table 1**.

161 The protein profiling was performed by the Psomagen service lab following OLINK's standard  
162 operating procedure. Quality control for the EXPLORE proteomic data was applied to all samples profiled  
163 at Stanford, which included samples from 28 SAs and 36 EURs in this study, using the "OlinkAnalyze"  
164 package in R, which is developed and maintained by the Olink Proteomics Data Science Team. First, we  
165 identified outliers within each protein panel through (1) principal component analysis and (2) assessment of  
166 median and inter-quartile range (IQR) values for Normalized Protein eXpression (NPX) across all samples  
167 measured. Data points were excluded if they (1) exhibited a standardized PC1 or PC2 value more than five  
168 standard deviations from the mean (in standardized PCA, this mean is zero), or (2) had a median NPX or  
169 IQR of NPX more than five standard deviations from their respective mean values. Further data points with  
170 QC or assay warnings were also removed.

## 171 Statistical Analysis

172 We first imputed missing variables using predictive mean matching (pmm) as implemented in the R  
173 package 'mice'(18) to minimize the loss of observations and maximize the power of our analyses. While a  
174 small number of missing protein levels were imputed among subjects with protein levels, we did not  
175 attempt to impute all protein levels in subjects who did not have any proteins measured.

176 Descriptive statistics are presented as mean +/- standard deviation for continuous variables and as  
177 count and percentages for categorical variables. Differences in baseline characteristics between EURs and  
178 SAs were compared using a t-test for continuous variables and a chi-square test for categorical variables.  
179 We computed Spearman correlations and P values between each measure and SSPG to identify variables  
180 significantly correlated with SSPG, adopting Bonferroni adjusted significance threshold  $0.05/30=0.00167$   
181 to account for the testing of 30 measures. This analysis included all 87 participants for non-protein  
182 variables and a subset of 64 participants for protein variables. The Spearman correlation was chosen due to  
183 its robustness to outliers and suitability for non-normally distributed data. Variables with significant  
184 correlations at the Bonferroni-adjusted threshold were identified as candidate predictors for further analysis  
185 regarding their role in SSPG differences between EUR and SA participants.

186 SSPG values were log-transformed to approximate a normal distribution prior to linear regression  
187 analysis of SSPG (**Supplementary Figure 1**). A base model with covariates age, sex and ancestral group  
188 was used for comparison. The first goal was to study whether adding selected groups of variables to this  
189 model attenuated the significance of the ancestral group variable. We considered three groups of variables  
190 from among those significantly correlated with SSPG: a) conventional measures of adiposity and physical  
191 activity, b) gold standard measures of adiposity and cardiorespiratory fitness, c) plasma proteins. The  
192 second goal was to estimate the extent to which different models accounted for the variability in SSPG. We  
193 performed multivariable linear regressions for the models described above, excluding the ancestral group  
194 variable, to evaluate the variance explained ( $R^2$ ) and residual standard error (SE) of SSPG in the combined  
195 ancestral groups and separately for each ancestral group. Lastly, to investigate the mediation path of select

196 proteins significantly correlated with SSPG, we computed their Pearson correlations with the gold standard  
 197 measures of adiposity and cardiorespiratory fitness. All analyses were performed using R.

## 198 Results

199 We enrolled 107 participants into the study but only 87 completed the testing protocol, including 46 SAs  
 200 and 41 EURs. Among those completing the protocol, 43% completed it within one month, 76% within  
 201 three months, 87% within six months, and 99% within a year. **Table 1** summarizes the characteristics of the  
 202 study participants, stratified by ancestral group. SAs were, on average, younger, had higher percentages of  
 203 total adipose tissue, as well as adipose tissue within their trunk and android regions. SAs also had a lower  
 204 lifetime recreational physical activity and reported lower amounts of physical activity in the week before  
 205 their IST. Significant differences between ancestral groups in plasma proteins related to insulin sensitivity  
 206 were also observed, with EURs showing higher levels of IGFBP1, IGFBP2, LPL, SCGB3A2 and ITGAV,  
 207 but lower levels of LEP and INHBC.  
 208

| <b>Table 1.</b> Characteristics of 41 European and 46 South Asian study participants |                  |           |                     |           |                |
|--------------------------------------------------------------------------------------|------------------|-----------|---------------------|-----------|----------------|
| <b>Variables</b>                                                                     | <b>Europeans</b> |           | <b>South Asians</b> |           | <b>P value</b> |
|                                                                                      | <b>Mean</b>      | <b>SD</b> | <b>Mean</b>         | <b>SD</b> |                |
| <b>Demographics</b>                                                                  |                  |           |                     |           |                |
| Age                                                                                  | 52.1             | 12.2      | 43.0                | 8.3       | <0.001         |
| Age*                                                                                 | 53.7             | 12.1      | 42.8                | 8.4       | <0.001         |
| Sex (N, %)                                                                           |                  |           |                     |           | 0.36           |
| Female                                                                               | 21               | 51.2      | 18                  | 39.1      |                |
| Male                                                                                 | 20               | 48.8      | 28                  | 60.9      |                |
| Sex (N, %)*                                                                          |                  |           |                     |           | 0.592          |
| Female                                                                               | 19               | 52.8      | 12                  | 42.9      |                |
| Male                                                                                 | 17               | 47.2      | 16                  | 57.1      |                |
| <b>Adiposity</b>                                                                     |                  |           |                     |           |                |
| <i>Conventional measures</i>                                                         |                  |           |                     |           |                |
| BMI                                                                                  | 24.8             | 3.9       | 25.5                | 3.3       | 0.355          |
| Waist circumference                                                                  | 88.4             | 11.6      | 88.5                | 12.7      | 0.995          |
| <i>DXA-derived 'gold standard' measures</i>                                          |                  |           |                     |           |                |
| % of total body fat                                                                  | 29.6             | 9.7       | 33.4                | 6.5       | 0.032          |
| % of total body fat in trunk region                                                  | 51.1             | 7.6       | 53.9                | 6.9       | 0.069          |
| % of total body fat in leg region                                                    | 34.3             | 6.7       | 32.3                | 6.2       | 0.145          |
| % of total body fat in arm region                                                    | 10.0             | 1.4       | 9.7                 | 1.4       | 0.434          |
| % of total body fat in gynoid region                                                 | 19.5             | 3.5       | 18.4                | 3.0       | 0.104          |
| % of total body fat in android region                                                | 8.8              | 2.1       | 9.6                 | 1.7       | 0.058          |
| % trunk (region) that is fat                                                         | 30.9             | 10.8      | 37.1                | 7.4       | 0.002          |
| % leg (region) that is fat                                                           | 29.9             | 10.9      | 31.5                | 7.6       | 0.429          |
| % arm (region) that is fat                                                           | 27.9             | 11.4      | 29.8                | 9.1       | 0.389          |
| % android (region) that is fat                                                       | 35.4             | 13.1      | 43.6                | 8.4       | 0.001          |
| % gynoid (region) that is fat                                                        | 36.4             | 12.5      | 39.3                | 8.7       | 0.214          |
| Android to gynoid fat ratio                                                          | 0.5              | 0.2       | 0.6                 | 0.2       | 0.073          |
| <b>Physical Activity and Fitness</b>                                                 |                  |           |                     |           |                |
| <i>Conventional measures</i>                                                         |                  |           |                     |           |                |
| LY Rec kcal/week                                                                     | 2643             | 1896      | 2017                | 1365      | 0.078          |
| LT Rec kcal/week                                                                     | 2000             | 1368      | 1286                | 884       | 0.004          |
| LT Occ kcal/week                                                                     | 7946             | 2249      | 7386                | 2096      | 0.232          |

|                                                                                                                                                                                                                                                                                                                                                                                                                                                                                                                                                                                                                                                                                                                                                                                                                                                                                                                                                                                                                                                                                                                                                                                                                                                                    |       |      |       |      |        |
|--------------------------------------------------------------------------------------------------------------------------------------------------------------------------------------------------------------------------------------------------------------------------------------------------------------------------------------------------------------------------------------------------------------------------------------------------------------------------------------------------------------------------------------------------------------------------------------------------------------------------------------------------------------------------------------------------------------------------------------------------------------------------------------------------------------------------------------------------------------------------------------------------------------------------------------------------------------------------------------------------------------------------------------------------------------------------------------------------------------------------------------------------------------------------------------------------------------------------------------------------------------------|-------|------|-------|------|--------|
| PA MET score last week                                                                                                                                                                                                                                                                                                                                                                                                                                                                                                                                                                                                                                                                                                                                                                                                                                                                                                                                                                                                                                                                                                                                                                                                                                             | 2445  | 1658 | 1376  | 800  | <0.001 |
| <i>Cardiopulmonary Exercise Treadmill Test derived 'gold standard' measure</i>                                                                                                                                                                                                                                                                                                                                                                                                                                                                                                                                                                                                                                                                                                                                                                                                                                                                                                                                                                                                                                                                                                                                                                                     |       |      |       |      |        |
| VO2 max                                                                                                                                                                                                                                                                                                                                                                                                                                                                                                                                                                                                                                                                                                                                                                                                                                                                                                                                                                                                                                                                                                                                                                                                                                                            | 36.92 | 10.3 | 34.78 | 6.19 | 0.237  |
| <b>Protein measures in plasma*</b>                                                                                                                                                                                                                                                                                                                                                                                                                                                                                                                                                                                                                                                                                                                                                                                                                                                                                                                                                                                                                                                                                                                                                                                                                                 |       |      |       |      |        |
| FABP2                                                                                                                                                                                                                                                                                                                                                                                                                                                                                                                                                                                                                                                                                                                                                                                                                                                                                                                                                                                                                                                                                                                                                                                                                                                              | 0.32  | 0.88 | 0.06  | 0.82 | 0.227  |
| FABP4                                                                                                                                                                                                                                                                                                                                                                                                                                                                                                                                                                                                                                                                                                                                                                                                                                                                                                                                                                                                                                                                                                                                                                                                                                                              | -0.66 | 0.73 | -0.44 | 0.61 | 0.22   |
| IGFBP1                                                                                                                                                                                                                                                                                                                                                                                                                                                                                                                                                                                                                                                                                                                                                                                                                                                                                                                                                                                                                                                                                                                                                                                                                                                             | 1.09  | 1.1  | 0.17  | 1.05 | 0.001  |
| IGFBP2                                                                                                                                                                                                                                                                                                                                                                                                                                                                                                                                                                                                                                                                                                                                                                                                                                                                                                                                                                                                                                                                                                                                                                                                                                                             | 0.66  | 0.59 | -0.06 | 0.64 | <0.001 |
| LEP                                                                                                                                                                                                                                                                                                                                                                                                                                                                                                                                                                                                                                                                                                                                                                                                                                                                                                                                                                                                                                                                                                                                                                                                                                                                | -1.59 | 1.94 | -0.41 | 1.23 | 0.007  |
| LPL                                                                                                                                                                                                                                                                                                                                                                                                                                                                                                                                                                                                                                                                                                                                                                                                                                                                                                                                                                                                                                                                                                                                                                                                                                                                | 0.22  | 0.61 | -0.19 | 0.53 | 0.006  |
| SCGB3A2                                                                                                                                                                                                                                                                                                                                                                                                                                                                                                                                                                                                                                                                                                                                                                                                                                                                                                                                                                                                                                                                                                                                                                                                                                                            | 0.63  | 0.77 | 0.22  | 0.76 | 0.037  |
| ADGRG1                                                                                                                                                                                                                                                                                                                                                                                                                                                                                                                                                                                                                                                                                                                                                                                                                                                                                                                                                                                                                                                                                                                                                                                                                                                             | 0.11  | 0.87 | -0.23 | 0.49 | 0.075  |
| ITGAV                                                                                                                                                                                                                                                                                                                                                                                                                                                                                                                                                                                                                                                                                                                                                                                                                                                                                                                                                                                                                                                                                                                                                                                                                                                              | 0.06  | 0.2  | -0.16 | 0.21 | <0.001 |
| RTN4R                                                                                                                                                                                                                                                                                                                                                                                                                                                                                                                                                                                                                                                                                                                                                                                                                                                                                                                                                                                                                                                                                                                                                                                                                                                              | -0.22 | 0.38 | -0.09 | 0.46 | 0.246  |
| INHBC                                                                                                                                                                                                                                                                                                                                                                                                                                                                                                                                                                                                                                                                                                                                                                                                                                                                                                                                                                                                                                                                                                                                                                                                                                                              | -0.44 | 0.66 | -0.04 | 0.43 | 0.008  |
| <b>Insuling Sensitivity</b>                                                                                                                                                                                                                                                                                                                                                                                                                                                                                                                                                                                                                                                                                                                                                                                                                                                                                                                                                                                                                                                                                                                                                                                                                                        |       |      |       |      |        |
| Fasting plasma glucose                                                                                                                                                                                                                                                                                                                                                                                                                                                                                                                                                                                                                                                                                                                                                                                                                                                                                                                                                                                                                                                                                                                                                                                                                                             | 96.3  | 9.2  | 97.9  | 8.2  | 0.388  |
| SSPG                                                                                                                                                                                                                                                                                                                                                                                                                                                                                                                                                                                                                                                                                                                                                                                                                                                                                                                                                                                                                                                                                                                                                                                                                                                               | 94.6  | 46.9 | 130.2 | 57.7 | 0.002  |
| SSPG*                                                                                                                                                                                                                                                                                                                                                                                                                                                                                                                                                                                                                                                                                                                                                                                                                                                                                                                                                                                                                                                                                                                                                                                                                                                              | 91.0  | 43.5 | 132.8 | 62.7 | 0.003  |
| Data are mean ± standard deviation (SD) (range) unless otherwise noted. *Subset with plasma proteins: 36 Europeans, 28 South Asians. SSPG: steady state plasma glucose derived from the insulin suppression test. concentration is a direct measure of insulin resistance (IR) where a higher SSPG concentration indicates greater IR compared to a lower SSPG concentration. BMI: body mass index; LY Rec kcal/week: Last-year recreational physical activity kcal/week; LT Rec kcal/week: Lifetime recreational physical activity kcal/week; LT Occ kcal/week: Lifetime occupational physical activity kcal/week; PA MET score last week: Physical activity metabolic task equivalent score last week; SSPG, steady-state plasma glucose; and VO2 max, amount of oxygen utilized during a cardiopulmonary exercise test with maximal effort; ADGRG1: Adhesion G Protein-Coupled Receptor G1; FABP2: Fatty Acid Binding Protein 2; FABP4: Fatty Acid Binding Protein 4; IGFBP1: Insulin Like Growth Factor Binding Protein 1; IGFBP2: Insulin Like Growth Factor Binding Protein 2; INHBC:Inhibin Subunit Beta C; ITGAV: Integrin Subunit Alpha V; LEP: Leptin; LPL: Lipoprotein Lipase; RTN4R: Reticulon 4 Receptor; SCGB3A2: Secretoglobulin Family 3A Member 2 |       |      |       |      |        |

209

210

211

212

213

214

215

216

217

218

219

220

221

222

223

224

225

226

The Spearman correlation analysis identified 16 variables significantly correlated with SSPG at Bonferroni correction (**Figure 1**). The variables that exhibited either a significant positive or negative correlation with SSPG included one conventional (BMI) and eight DXA derived measures of adiposity, one conventional (PA MET score last week from IPAQ) and one gold standard (VO<sub>2</sub> max) of physical fitness and five proteins (**Supplementary Figure 2**). Among the conventional measures, BMI had the strongest correlation, which was only the tenth strongest overall. For subsequent multivariable regression analyses, we retained only percent trunk that is fat variable among eight adiposity variables having significant Spearman correlation with SSPG given this variable had the strongest correlation with SSPG and was moderately to strongly correlated with other adiposity measures ( $r=0.45-0.99$ ). Among the proteins correlated with SSPG, we excluded from the linear regression FABP4, which was strongly correlated with LEP ( $r=0.75$ ), and IGFBP1, which was strongly correlated with IGFBP2 ( $r=0.73$ ) and retained INHBC, LEP, IGFBP2.

To make comparisons between models more justifiable, all were fit using the subset of participants with protein measures. In linear regression of log-transformed SSPG with covariates age, sex and ancestry, difference in mean SSPG levels between ancestry groups was strongly significant ( $\beta=0.471$ ,  $SE=0.125$ ,  $P=0.0004$ ). Adding conventional measures, BMI and PA MET score to this model reduced the  $\beta$  coefficient for ancestral group by 39% although its significance persisted ( $\beta=0.286$ ,  $SE=0.119$ ,  $P=0.019$ ). The

227 difference between ancestral groups was further reduced and was no longer significant when gold standard  
 228 measures (percent trunk that is fat, VO<sub>2</sub> max) ( $\beta=0.142$ , SE=0.116, P=0.228) or the three retained IR-  
 229 related proteins levels in plasma ( $\beta=0.069$ , SE=0.114, P=0.012) were incorporated (**Figure 2**;  
 230 **Supplementary Table 2**).

231 To assess R<sup>2</sup> for SSPG by different models, we repeated multivariable linear regressions described  
 232 above without the ancestral group variable. This analysis evaluated the R<sup>2</sup> for SSPG in the combined as  
 233 well as in the SAs and EURs separately. The R<sup>2</sup> values when using conventional measures of adiposity and  
 234 physical activity (SA: 0.06; EUR: 0.41; combined ancestral groups: 0.32) show that the combination of  
 235 these measures was much more strongly associated with SSPG in EUR participants compared to SA  
 236 participants. The R<sup>2</sup> values when using gold standard measures of adiposity and cardiorespiratory fitness  
 237 (SA: 0.36; EUR: 0.37; combined ancestral groups: 0.45) was about the same in both ancestry groups—and  
 238 also comparable to the value in EUR for the conventional measures. The protein model showed the highest  
 239 R<sup>2</sup> values (SA: 0.57; EUR: 0.49; combined ancestral groups: 0.55) and might be more strongly associated  
 240 with SSPG in SA than in EUR. The residual SEs of these fits showed similar trends (**Supplementary**  
 241 **Table 2**). Additionally, we observed significant correlations between gold standard measures of adiposity  
 242 and fitness and the five proteins that were significantly correlated with SSPG (**Table 2**). Notably, percent  
 243 trunk that is fat showed strong positive correlation with FABP4 and LEP ( $r>0.7$ ). Concurrently, these two  
 244 proteins showed very strong negative correlations with VO<sub>2</sub> max. IGFBP1 and IGFBP2 were significantly  
 245 correlated with percent trunk that is fat but not with VO<sub>2</sub> max.

**Table 2.** Pearson correlations between gold standard measures and plasma protein, ordered by P value within each gold standard measure

| Gold standard measures       | Proteins | Pearson correlation | P value  |
|------------------------------|----------|---------------------|----------|
| % trunk (region) that is fat | LEP      | 0.853               | <1E-15   |
| % trunk (region) that is fat | FABP4    | 0.775               | 5.84E-14 |
| % trunk (region) that is fat | INHBC    | 0.657               | 3.61E-09 |
| % trunk (region) that is fat | IGFBP1   | -0.461              | 1.25E-04 |
| % trunk (region) that is fat | IGFBP2   | -0.435              | 3.30E-04 |
| VO <sub>2</sub> max          | LEP      | -0.814              | <1E-15   |
| VO <sub>2</sub> max          | FABP4    | -0.729              | 8.70E-12 |
| VO <sub>2</sub> max          | INHBC    | -0.451              | 1.85E-04 |
| VO <sub>2</sub> max          | IGFBP2   | 0.129               | 3.10E-01 |
| VO <sub>2</sub> max          | IGFBP1   | 0.129               | 3.11E-01 |

VO<sub>2</sub> max, amount of oxygen utilized during a cardiopulmonary exercise test with maximal effort;  
 FABP4: Fatty Acid Binding Protein 4; IGFBP1: Insulin Like Growth Factor Binding Protein 1; IGFBP2:  
 Insulin Like Growth Factor Binding Protein 2; INHBC: Inhibin Subunit Beta C; LEP: Leptin.

246

## 247 Discussion

248 In this study, we evaluated and compared the relationship between both conventional and gold standard  
 249 measures of adiposity and fitness, as well as specific plasma proteins, with SSPG. We found the strongest  
 250 correlates of SSPG to be multiple DXA-derived measures, VO<sub>2</sub> max, and multiple plasma proteins  
 251 previously robustly linked to IR. Correlations with SSPG for these more accurate measures were notably  
 252 higher when compared to conventional measures such as BMI and questionnaire-based measures of  
 253 physical activity. Including either the gold standard measures of adiposity and fitness or the plasma  
 254 proteins in multivariate linear regressions of SSPG attenuated differences in SSPG between ancestral  
 255 groups and made these difference non-significant, suggesting that disparities in IR between SAs and EURs  
 256 might be at least partially due to the availability and accuracy of these measures.

257 The observed differences in the strength of associations and explanation of variance of various  
 258 regression models between EUR and SA participants suggest that tailored approaches may be necessary for  
 259 effective management and intervention in diverse populations. In our study, gold standard measures of



260 adiposity and fitness, such as percent trunk that is fat and VO<sub>2</sub> max, explained more of the variance in  
261 SSPG in EUR participants than in SAs. Conversely, five plasma proteins explained more of the variance in  
262 SSPG in SA participants. These findings underscore the importance of considering adiposity, fitness and  
263 protein biomarkers when assessing insulin sensitivity in different ancestral groups. If validated, this  
264 understanding suggests the need for population-specific strategies to effectively address insulin resistance,  
265 considering the unique physiological and metabolic profiles of different ancestral groups.

266 Prior studies have reported that SAs have a greater degree of IR and face a higher risk of IR-related  
267 complications compared with EURs (2, 19, 20). However, few have documented differences between SAs  
268 and EURs using direct ‘gold standard’ measures of insulin sensitivity. Given the impractical nature of  
269 conducting a direct measure of insulin sensitivity in large numbers, most large-scale epidemiologic studies  
270 have generally made use of more easily obtainable surrogate measures of IR (1, 21). Not surprisingly, the  
271 four studies that have published such data have consisted of cross-sectional analyses of small cohorts (n  
272 =10 to 29 South Asians) which have nevertheless demonstrated a significantly lower degree of insulin  
273 sensitivity in SAs compared to whites independent of age, sex, BMI, and physical activity (22-25). Of  
274 these, three assessed fat mass using “doubly indirect” methods such as waist circumference, BMI, skin  
275 folds, and bioelectrical impedance, while the fourth used the more reliable “singly indirect” method of  
276 densitometry (22-25). Although this latter study suggested persistent lower insulin sensitivity in SAs  
277 compared to whites at various percentages of fat, a test of the statistical significance of these differences  
278 was not reported (25). None of these studies measured and adjusted for VO<sub>2</sub> max although differences in  
279 VO<sub>2</sub> max and caliper-based measure of adiposity explained differences in a surrogate measure of IR,  
280 Homeostatic Model Assessment for Insulin Resistance (HOMA-IR), in a fifth study of interest (26). To our  
281 knowledge, our study is the first to use gold-standard measures for IR, adiposity, and cardiorespiratory  
282 fitness to assess differences in IR.

283 The increased IR among SAs compared to EURs may be driven by multiple related ancestral group  
284 differences involving the handling of the transformation of excess calories into adipose tissue. First, the  
285 overall degree of adiposity may differ given prior studies have documented higher percent body fat at each  
286 level of BMI among SAs compared to EURs (27, 28). Second, SAs may be more prone than EURs to store  
287 surplus energy within the visceral adipose tissue (VAT) compartment, rather than subcutaneous adipose  
288 tissue (SAT), increasing risk through the negative metabolic effects of ectopic fat on the liver and other  
289 intra-abdominal organs (27, 29-31). A newly emerging but related hypothesis suggests that the metabolic  
290 outcomes of obesity might also be linked to a reduced ability to store energy in the SAT compartment (32,  
291 33). This hypothesis is supported by the identification of a heritable ‘favorable adiposity phenotype’ through  
292 recent genome-wide association studies and the possibility that the frequency of such favorable genetic  
293 variants is decreased among SAs, although this conjecture still requires further, larger genetic studies for  
294 substantiation (32, 33). Furthermore, it is important to highlight that the evidence suggesting stronger  
295 correlations between VAT and IR, as compared to SAT and IR, using both proxy and direct measures,  
296 remains inconclusive (34, 35). Lastly, a recent study involving two UK-based cohorts that underwent  
297 abdominal magnetic resonance imaging (MRIs) failed to confirm an elevated VAT to SAT ratio and  
298 intrahepatic fat percentage among SAs compared to EURs (36).

299 Lower levels of physical activity among SAs compared to EURs may also be contributing to  
300 differences in insulin sensitivity (37-40). Physical activity has both immediate and long-term effects on  
301 insulin sensitivity that may be mediated through reductions in VAT and not be fully captured through a  
302 measure of physical fitness such as V02 max which largely reflects a combination of both peripheral  
303 adaptations within skeletal muscle as well as adaptations centrally involving more mechanical aspects of  
304 the cardiovascular system such as cardiac output. We attempted to capture both long-term and short-term  
305 effects on insulin sensitivity through the CPET and our self-reported physical activity questionnaires but  
306 found that the CPET-derived VO<sub>2</sub> max was the most strongly correlated measure to SSPG with no  
307 incremental benefit provided by our physical activity questionnaire data.

308 We found plasma levels of INHBC, FABP4, and LEP to be moderately to highly correlated with  
309 both percent trunk that is fat and VO<sub>2</sub> max, suggesting that these proteins are integrally linked with both  
310 adiposity and fitness. In contrast, IGFBP2 and IGFBP1 were only significantly correlated with percent

311 trunk that is fat, suggesting their relationship with SSPG is primarily mediated through adiposity rather  
312 than fitness. The role of these five candidate proteins in metabolic regulation is reasonably well established.  
313 INHBC, a member of the transforming growth factor-beta family, regulates the secretion of follicle-  
314 stimulating hormone, hypothalamic, pituitary, gonadal hormones, and insulin (41). Additionally, INHBC is  
315 highly expressed in the liver (<https://gtexportal.org/home/gene/INHBC>). LEP, primarily secreted by  
316 adipose tissue, is a key regulator of energy balance and glucose metabolism (42). IGFBP2 is known to  
317 regulate insulin and glucose metabolism and has been found to be significantly increased following  
318 bariatric surgery in parallel to the improvement in insulin sensitivity (43, 44). Similarly, IGFBP1 also  
319 regulates insulin and glucose metabolism with higher levels often observed in individuals with higher  
320 insulin sensitivity (45). Lastly, FABP4 is primarily found in macrophages and adipose tissue, where it plays  
321 a crucial role in controlling the storage and breakdown of fatty acids and serves as a key mediator of  
322 inflammation (42). Given the moderate-to-high correlation between these proteins with gold standard  
323 measures of adiposity and/or fitness, they may serve as proxies for gold standard measures of adiposity and  
324 fitness acquired through DXA scan and CPET. If further replicated, the routine measurement of these  
325 proteins has the potential to substantially improve the identification of individuals at risk with a fraction of  
326 the cost of more costly and less accessible gold standard procedures.

327 Our study has certain limitations worthy of mention. First, the study population consisted of  
328 relatively healthy volunteers from the San Francisco Bay Area, which may limit the generalizability of our  
329 findings. The observed ordering of measures and models by strength of correlation, differences between  
330 ancestry groups and explanation of variability in SSPG might not persist in a different sample. The SA  
331 sample also included a large geographic area covering various countries, and there may be heterogeneity  
332 within the South Asian sub-groups that is not captured. While we reported that plasma protein and gold  
333 standard measures of adiposity and cardiorespiratory fitness appear to correlate with differences in insulin  
334 sensitivity between EURs and SAs, we also acknowledge that these results are based on the specific  
335 characteristics and potential recruitment biases of the study sample. Although the availability of gold  
336 standard measures overall is a key strength, the cost and time required to perform these studies is great,  
337 which restricted the sample size and power of our study. Among the strongest correlates for SSPG, multiple  
338 DXA-derived measures of adiposity were highly correlated with each other. We retained only the percent  
339 trunk that is fat in the study due to its strongest association with SSPG, but we cannot discard the  
340 possibility that other adiposity measures may ultimately serve as better correlates to SSPG in the general  
341 population. Similarly, we cannot determine whether plasma protein LEP or FAB4 is more explanatory, or  
342 IGFBP1 versus IGFBP2. Furthermore, the protein measures are relative quantifications, and our findings  
343 require replication and validation in larger sample sizes with assays that can deliver absolute levels before  
344 they can be integrated into clinical care. Lastly, the cross-sectional design of the study precludes causal  
345 inferences. Future studies with larger sample sizes and longitudinal designs are warranted to validate our  
346 findings and to explore the causal pathways linking these candidate predictors to SSPG within and across  
347 ancestral groups.

348 In conclusion, our study demonstrated that accurate measures of adiposity and cardiorespiratory  
349 fitness, as well as plasma proteins, may help to explain differences in SSPG between EUR and SA  
350 participants as well as variability within these ancestry groups. These measures may provide a more  
351 comprehensive understanding of insulin sensitivity differences between EUR and SA participants, with  
352 substantially more explanatory power than BMI. Our findings underscore the importance of considering  
353 multiple biological factors in the assessment of insulin resistance and support the potential utility of  
354 specific plasma proteins as biomarkers for personalized intervention strategies.

355 **Acknowledgements**

356 **Funding and Assistance:** This study was supported by grants from the National Institutes of Health  
357 K23DK088942 and R01DK11418.

358 **Conflict of Interest:** Authors have no conflicts of interest.

359 **Author Contributions and Guarantor Statement:** K.N.C., H.F., K.K., J.N.M., L.P., F.A., and T.L.A.  
360 were involved in the conception, design, and conduct of the study; P.K., L.S., S.J., F.A., and T.L.A were  
361 involved in the analysis and interpretation of the results. P.K., L.S., A.S., F.A., and T.L.A. wrote the initial  
362 drafts of the manuscript, and all authors edited, reviewed, and approved the final version of the manuscript.  
363 T.L.A. is the guarantor of this work and, as such, had full access to all the data in the study and takes  
364 responsibility for the integrity of the data and the accuracy of the data analysis.

## References

1. Einhorn D, Reaven GM, Cobin RH, Ford E, Ganda OP, Handelsman Y, et al. American College of Endocrinology position statement on the insulin resistance syndrome. *Endocr Pract*. 2003;9(3):237-52.
2. Volgman AS, Palaniappan LS, Aggarwal NT, Gupta M, Khandelwal A, Krishnan AV, et al. Atherosclerotic Cardiovascular Disease in South Asians in the United States: Epidemiology, Risk Factors, and Treatments: A Scientific Statement From the American Heart Association. *Circulation*. 2018;138(1):e1-e34.
3. Narayan KMV, Kanaya AM. Why are South Asians prone to type 2 diabetes? A hypothesis based on underexplored pathways. *Diabetologia*. 2020;63(6):1103-9.
4. Ke C, Narayan KMV, Chan JCN, Jha P, Shah BR. Pathophysiology, phenotypes and management of type 2 diabetes mellitus in Indian and Chinese populations. *Nat Rev Endocrinol*. 2022;18(7):413-32.
5. Muniyappa R, Lee S, Chen H, Quon MJ. Current approaches for assessing insulin sensitivity and resistance in vivo: advantages, limitations, and appropriate usage. *Am J Physiol Endocrinol Metab*. 2008;294(1):E15-26.
6. Hollenbeck CB, Haskell W, Rosenthal M, Reaven GM. Effect of habitual physical activity on regulation of insulin-stimulated glucose disposal in older males. *J Am Geriatr Soc*. 1985;33(4):273-7.
7. Su HY, Sheu WH, Chin HM, Jeng CY, Chen YD, Reaven GM. Effect of weight loss on blood pressure and insulin resistance in normotensive and hypertensive obese individuals. *Am J Hypertens*. 1995;8(11):1067-71.
8. Holmes CJ, Racette SB. The Utility of Body Composition Assessment in Nutrition and Clinical Practice: An Overview of Current Methodology. *Nutrients*. 2021;13(8):2493.
9. Althubaiti A. Information bias in health research: definition, pitfalls, and adjustment methods. *J Multidiscip Healthc*. 2016;9:211-7.
10. Ross R, Blair SN, Arena R, Church TS, Despres JP, Franklin BA, et al. Importance of Assessing Cardiorespiratory Fitness in Clinical Practice: A Case for Fitness as a Clinical Vital Sign: A Scientific Statement From the American Heart Association. *Circulation*. 2016;134(24):e653-e99.
11. Bird SR, Hawley JA. Update on the effects of physical activity on insulin sensitivity in humans. *BMJ Open Sport & Exercise Medicine*. 2017;2(1):e000143.
12. Solomon TPJ, Malin SK, Karstoft K, Knudsen SH, Haus JM, Laye MJ, et al. Association Between Cardiorespiratory Fitness and the Determinants of Glycemic Control Across the Entire Glucose Tolerance Continuum. *Diabetes Care*. 2015;38(5):921-9.
13. Zanetti D, Stell L, Gustafsson S, Abbasi F, Tsao PS, Knowles JW, et al. Plasma proteomic signatures of a direct measure of insulin sensitivity in two population cohorts. *Diabetologia*. 2023;66(9):1643-54.
14. Myers J, Kaykha A, George S, Abella J, Zaheer N, Lear S, et al. Fitness versus physical activity patterns in predicting mortality in men. *Am J Med*. 2004;117(12):912-8.
15. Craig CL, Marshall AL, Sjoström M, Bauman AE, Booth ML, Ainsworth BE, et al. International physical activity questionnaire: 12-country reliability and validity. *Med Sci Sports Exerc*. 2003;35(8):1381-95.
16. Myers J, Buchanan N, Walsh D, Kraemer M, McAuley P, Hamilton-Wessler M, et al. Comparison of the ramp versus standard exercise protocols. *J Am Coll Cardiol*. 1991;17(6):1334-42.
17. Pei D, Jones CN, Bhargava R, Chen YD, Reaven GM. Evaluation of octreotide to assess insulin-mediated glucose disposal by the insulin suppression test. *Diabetologia*. 1994;37(8):843-5.
18. Buuren Sv. Flexible imputation of missing data. Second edition. ed. Boca Raton: CRC Press, Taylor & Francis Group; 2018. xxvii, 415 pages p.
19. Mahadevan M, Bose M, Gawron KM, Blumberg R. Metabolic Syndrome and Chronic Disease Risk in South Asian Immigrants: A Review of Prevalence, Factors, and Interventions. *Healthcare (Basel)*. 2023;11(5):720.
20. Gujral UP, Kanaya AM. Epidemiology of diabetes among South Asians in the United States: lessons from the MASALA study. *Ann N Y Acad Sci*. 2021;1495(1):24-39.

21. Yeni-Komshian H, Carantoni M, Abbasi F, Reaven GM. Relationship between several surrogate estimates of insulin resistance and quantification of insulin-mediated glucose disposal in 490 healthy nondiabetic volunteers. *Diabetes Care*. 2000;23(2):171-5.
22. Laws A, Jeppesen JL, Maheux PC, Schaaf P, Chen YD, Reaven GM. Resistance to insulin-stimulated glucose uptake and dyslipidemia in Asian Indians. *Arterioscler Thromb*. 1994;14(6):917-22.
23. Raji A, Seely EW, Arky RA, Simonson DC. Body fat distribution and insulin resistance in healthy Asian Indians and Caucasians. *J Clin Endocrinol Metab*. 2001;86(11):5366-71.
24. Liew CF, Seah ES, Yeo KP, Lee KO, Wise SD. Lean, nondiabetic Asian Indians have decreased insulin sensitivity and insulin clearance, and raised leptin compared to Caucasians and Chinese subjects. *Int J Obes Relat Metab Disord*. 2003;27(7):784-9.
25. Chandalia M, Lin P, Seenivasan T, Livingston EH, Snell PG, Grundy SM, et al. Insulin resistance and body fat distribution in South Asian men compared to Caucasian men. *PLoS One*. 2007;2(8):e812.
26. Ghouri N, Purves D, McConnachie A, Wilson J, Gill JM, Sattar N. Lower cardiorespiratory fitness contributes to increased insulin resistance and fasting glycaemia in middle-aged South Asian compared with European men living in the UK. *Diabetologia*. 2013;56(10):2238-49.
27. Deurenberg-Yap M, Schmidt G, van Staveren WA, Deurenberg P. The paradox of low body mass index and high body fat percentage among Chinese, Malays and Indians in Singapore. *Int J Obes Relat Metab Disord*. 2000;24(8):1011-7.
28. Rana A, de Souza RJ, Kandasamy S, Lear SA, Anand SS. Cardiovascular risk among South Asians living in Canada: a systematic review and meta-analysis. *CMAJ Open*. 2014;2(3):E183-91.
29. Sniderman AD, Bhopal R, Prabhakaran D, Sarrafzadegan N, Tchernof A. Why might South Asians be so susceptible to central obesity and its atherogenic consequences? The adipose tissue overflow hypothesis. *Int J Epidemiol*. 2007;36(1):220-5.
30. Lear SA, Chockalingam A, Kohli S, Richardson CG, Humphries KH. Elevation in cardiovascular disease risk in South Asians is mediated by differences in visceral adipose tissue. *Obesity (Silver Spring)*. 2012;20(6):1293-300.
31. Lear SA, Humphries KH, Kohli S, Chockalingam A, Frohlich JJ, Birmingham CL. Visceral adipose tissue accumulation differs according to ethnic background: results of the Multicultural Community Health Assessment Trial (M-CHAT). *Am J Clin Nutr*. 2007;86(2):353-9.
32. Abraham A, Yaghootkar H. Identifying obesity subtypes: A review of studies utilising clinical biomarkers and genetic data. *Diabetic Medicine*. 2023;40(12).
33. Lotta LA, Gulati P, Day FR, Payne F, Ongen H, van de Bunt M, et al. Integrative genomic analysis implicates limited peripheral adipose storage capacity in the pathogenesis of human insulin resistance. *Nat Genet*. 2017;49(1):17-26.
34. Reaven GM. Insulin resistance: the link between obesity and cardiovascular disease. *Endocrinol Metab Clin North Am*. 2008;37(3):581-601, vii-viii.
35. Preis SR, Massaro JM, Robins SJ, Hoffmann U, Vasan RS, Irlbeck T, et al. Abdominal subcutaneous and visceral adipose tissue and insulin resistance in the Framingham heart study. *Obesity (Silver Spring)*. 2010;18(11):2191-8.
36. Alenaini W, Parkinson JRC, McCarthy JP, Goldstone AP, Wilman HR, Banerjee R, et al. Ethnic Differences in Body Fat Deposition and Liver Fat Content in Two UK-Based Cohorts. *Obesity (Silver Spring)*. 2020;28(11):2142-52.
37. Williams ED, Stamatakis E, Chandola T, Hamer M. Assessment of physical activity levels in South Asians in the UK: findings from the Health Survey for England. *Journal of epidemiology and community health*. 2011;65(6):517-21.
38. Biddle GJH, Edwardson CL, Rowlands AV, Davies MJ, Bodicoat DH, Hardeman W, et al. Differences in objectively measured physical activity and sedentary behaviour between white Europeans and south Asians recruited from primary care: cross-sectional analysis of the PROPELS trial. *BMC Public Health*. 2019;19(1):95.
39. Murlasits Z, Kupai K, Kneffel Z. Role of physical activity and cardiorespiratory fitness in metabolically healthy obesity: a narrative review. *BMJ Open Sport Exerc Med*. 2022;8(4):e001458.

40. Arsenault BJ, Lachance D, Lemieux I, Almeras N, Tremblay A, Bouchard C, et al. Visceral adipose tissue accumulation, cardiorespiratory fitness, and features of the metabolic syndrome. *Arch Intern Med*. 2007;167(14):1518-25.
41. Namwanje M, Brown CW. Activins and Inhibins: Roles in Development, Physiology, and Disease. *Cold Spring Harb Perspect Biol*. 2016;8(7).
42. Floresta G, Patamia V, Zagni C, Rescifina A. Adipocyte fatty acid binding protein 4 (FABP4) inhibitors. An update from 2017 to early 2022. *Eur J Med Chem*. 2022;240:114604.
43. Boughanem H, Yubero-Serrano EM, Lopez-Miranda J, Tinahones FJ, Macias-Gonzalez M. Potential Role of Insulin Growth-Factor-Binding Protein 2 as Therapeutic Target for Obesity-Related Insulin Resistance. *Int J Mol Sci*. 2021;22(3).
44. Faramia J, Hao Z, Mumphrey MB, Townsend RL, Miard S, Carreau AM, et al. IGFBP-2 partly mediates the early metabolic improvements caused by bariatric surgery. *Cell Rep Med*. 2021;2(4):100248.
45. Haywood NJ, Slater TA, Matthews CJ, Wheatcroft SB. The insulin like growth factor and binding protein family: Novel therapeutic targets in obesity & diabetes. *Mol Metab*. 2019;19:86-96.

## Figure Captions

**Figure 1. Absolute Spearman correlation with SSPG, sorted by P values.** The color represents the direction of the correlations, with blue indicating positive correlations and orange indicating negative correlations. The length of each bar represents the absolute value of the Spearman correlation coefficients. Variables significantly correlated with SSPG at Bonferroni-adjusted significance levels ( $P < 0.00167$ ) are marked with an asterisk (\*).

**Figure 2. Results from multivariable regression of log(SSPG) with selected sets of covariates, fitting only participants with protein measures.** The top panel displays the beta coefficients ( $\pm$  95% confidence interval) for the ancestral group variable (SA vs EUR) in each model: base model (age and sex), conventional measures of adiposity and physical activity (BMI and PA MET scores last week), gold standard measures of adiposity and fitness (percent trunk fat and  $VO_2$  max), and proteins (INHBC, LEP, IGF2BP2). The red dashed line indicates a beta coefficient of zero. The bottom panel displays the adjusted  $R^2$  values of the same models, excluding ancestral group variable, for the combined ancestral group (EURs and SAs) in blue, as well as separately for SA (orange) and EUR (green) participants. The black dashed line at 0.127 indicates the adjusted  $R^2$  from the base model with age, sex, and ancestral group.

# Absolute Spearman Correlation Coefficients with SSPG

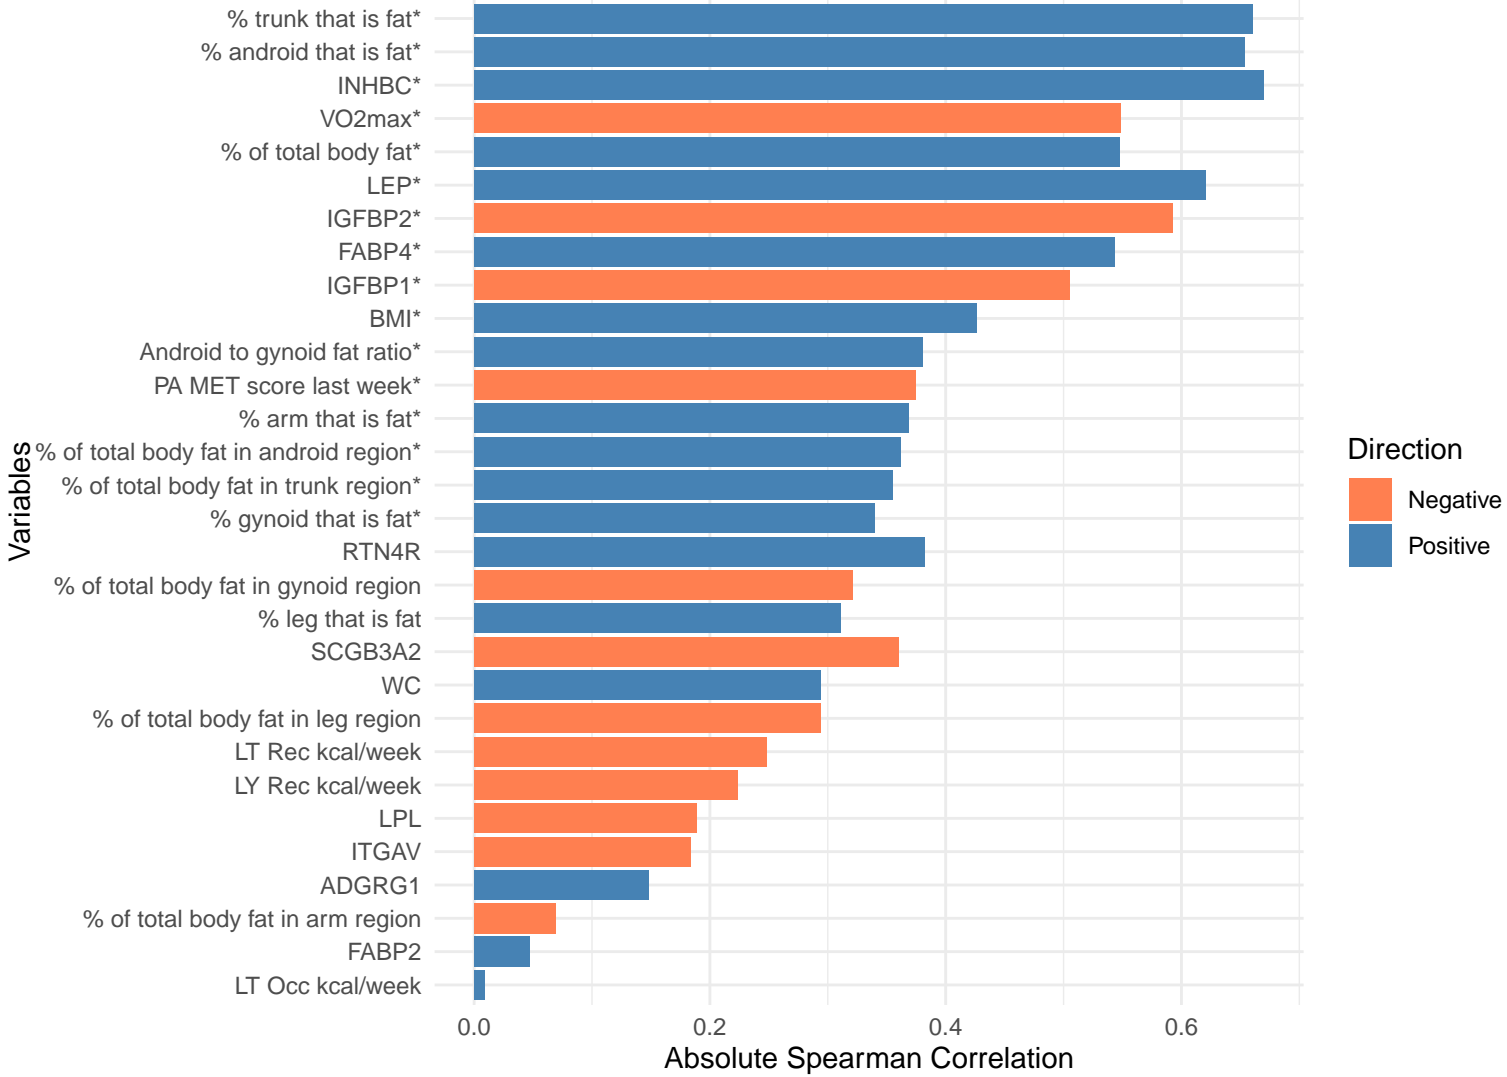



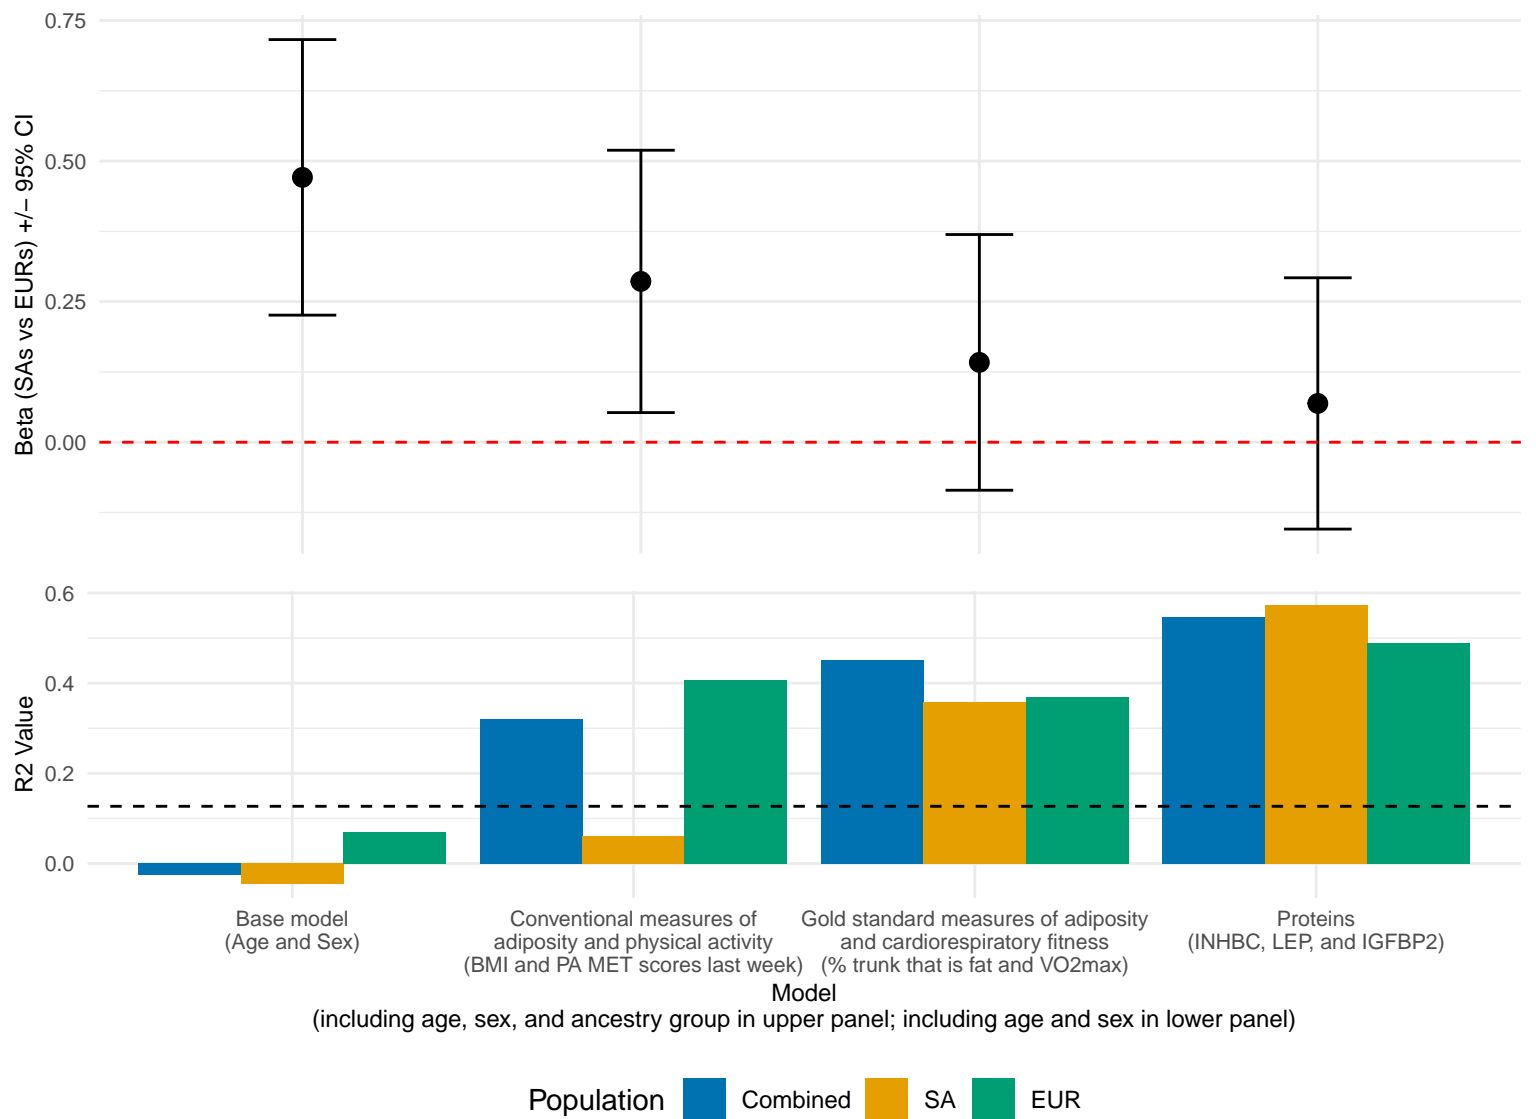

Source: https://medrxiv.org/content/10.1101/2024.09.06.24313199v1.full.pdf
